# Supplementary material for: Responsive photonic barcodes for sensitive multiplex bioassay
Source: Royal Society of Chemistry journal article supplement (doi:10.1039/c7nr04867j), 2017-01-01
Supplement: c7nr04867j1.pdf [file c7nr04867j1.pdf]

## Supporting Information

### Responsive photonic barcodes for sensitive multiplex bioassay

Chengxin Luan<sup>a</sup>, Yueshuang Xu<sup>a</sup>, Fanfan Fu<sup>b</sup>, Huan Wang<sup>b</sup>, Qionghua Xu<sup>b</sup>, Baoan  
Chen<sup>a\*</sup>, Yuanjin Zhao<sup>a,b\*</sup>

<sup>a</sup> *Department of Hematology and Oncology (Key Department of Jiangsu Medicine),  
Zhongda Hospital, School of Medicine, Southeast University, Nanjing 210009, China.  
E-mail addresses: cba8888@hotmail.com ; yjzhao@seu.edu.cn*

<sup>b</sup> *School of Biological Science and Medical Engineering, Southeast University,  
Nanjing 210096, China.*

**Author contribution.** C.X.L carried out the experiments, analyzed data and wrote the paper; Y.J.Z. conceived the idea, designed the experiment and revised the paper; Y.S.X, F.F.F, H.W and Q.H.X. helped carry out the experiments, analyze data and write the paper; B.A.C contributed to scientific discussion of the article.

## Supporting Figures:

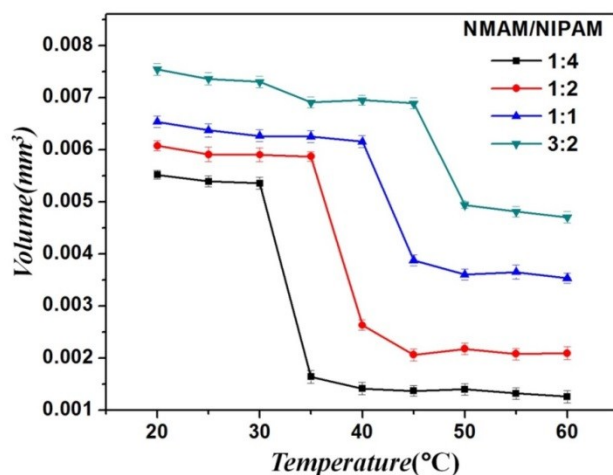

**Figure S1.** VPTT of volume changes of PhC barcodes made by different ratios of NIPAM to NMAM 4:1, 2:1, 1:1 and 2:3(mass ratio), 8% PEGDA,5% AA, NIPAM to BIS 20:1(mass ratio) and 1% HMPP. Error bars stand for standard deviations.

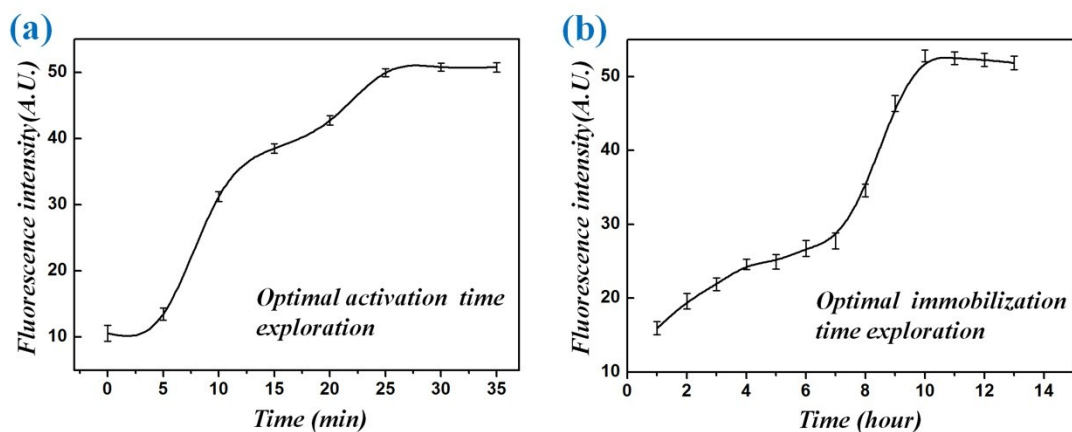

**Figure S2.** Effects of (a) activation time and (b) immobilization time on fluorescence intensity. The number of replicates at every time point was three. Error bars stand for standard deviations.

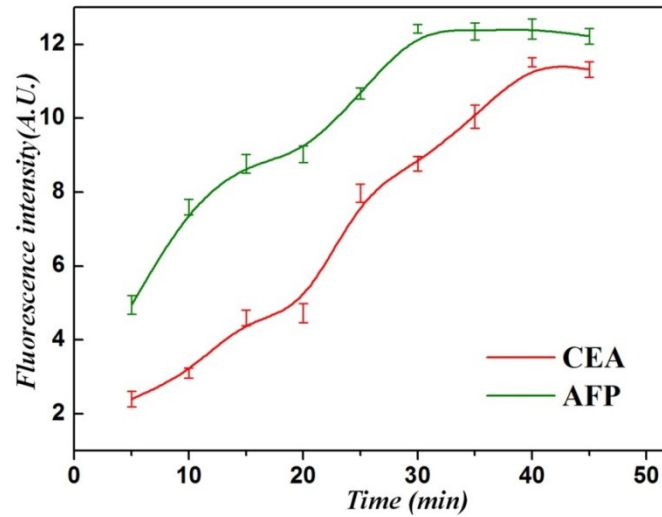

**Figure S3.** The relation of incubation time and fluorescence intensities (at 500 ng/mL for AFP and CEA). The number of replicates at any time point was three. Error bars stand for standard deviations.

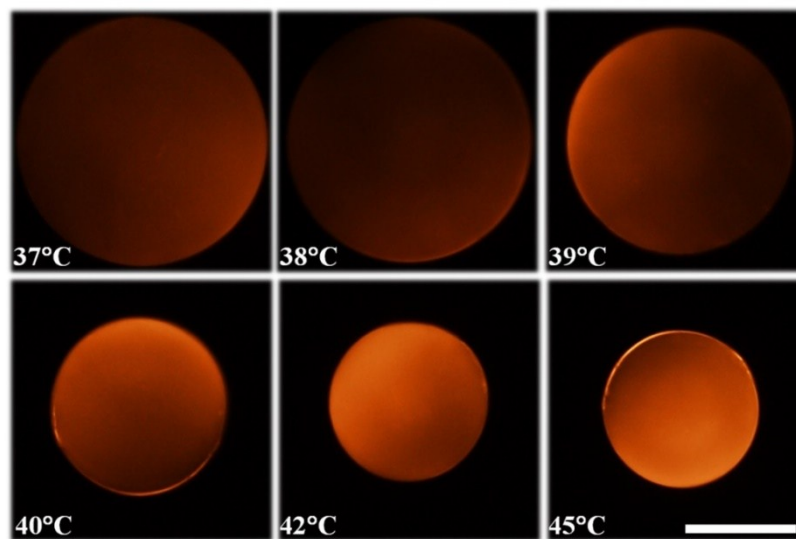

**Figure S4.** Thermal response resulted change of the volume and fluorescence intensity of the PhC barcodes. Using an example of AFP at 1000 ng/mL. The scale bar is 100  $\mu\text{m}$ .

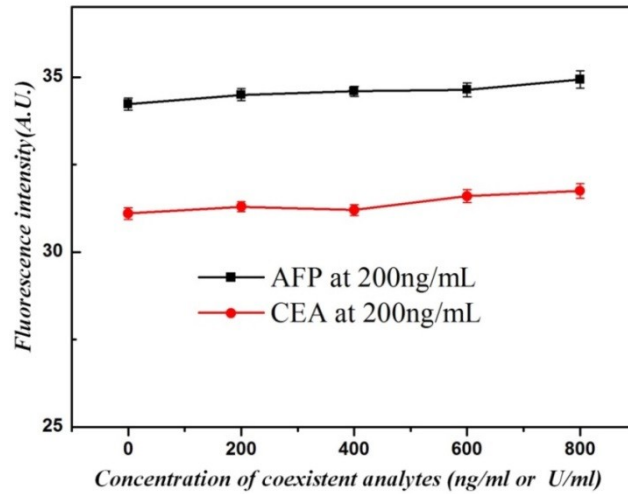

**Figure S5.** Evaluation of cross-reactivity. The cross-reactivity of AFP was examined by comparing the fluorescence signals at 200 ng/mL with increasing levels of CEA and CA125; the cross-reactivity of CEA was examined by comparing the fluorescence signals at 200 ng/mL with increasing concentrations of AFP and CA125. The number of replicates at every concentration was three. Error bars represent standard deviations.
